# Supplementary material for: Draft genome sequence of Brevibacterium epidermidis EZ-K02 isolated from nitrocellulose-contaminated wastewater environments
Source: PubMed Central journal article supplement (PMC5767901; doi:10.1016/j.dib.2017.12.053), 2018-01-03
Supplement: mmc1.pdf [file mmc1.pdf]

**Conflicts of interest:**

The authors have declared that no competing interest exists.

My co-authors have agreed to submit the article to Data in Brief and have given me the authority to act on their behalf as corresponding author. The work described has not been published previously, it is not under consideration for publication elsewhere, and publication is approved by all authors.

Sincerely,

Dr. Ayrat M. Ziganshin

Associate Professor

Department of Microbiology

Kazan (Volga Region) Federal University

Kazan 420008, The Republic of Tatarstan, Russia

Phone: +7-843-2337872

E-mail: a.ziganshin06@fulbrightmail.org

A handwritten signature in cursive script, reading "Ziganshin", is written over a horizontal line.
